# Supplementary material
Source: publisher site journal article supplement (https://www.dovepress.com/article/569281)
Supplement: Supplementary file 1 [file 569281%20Revised%20Supplementary%20Materials.pdf]

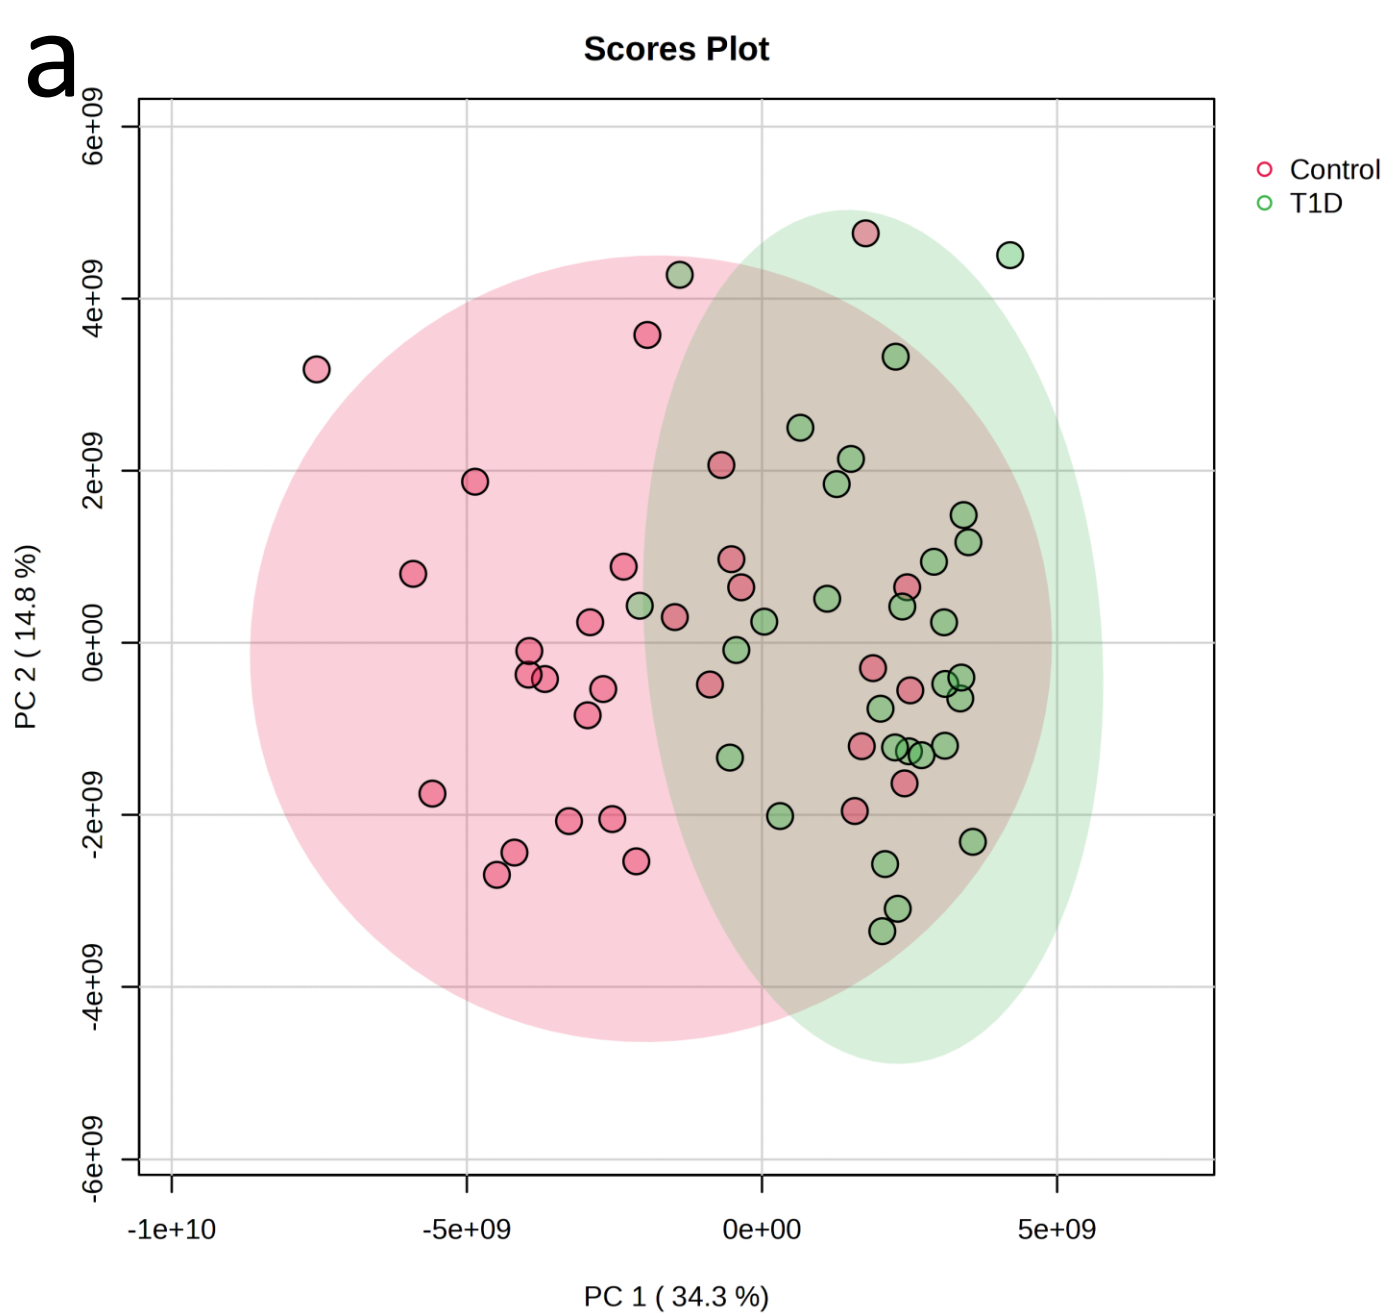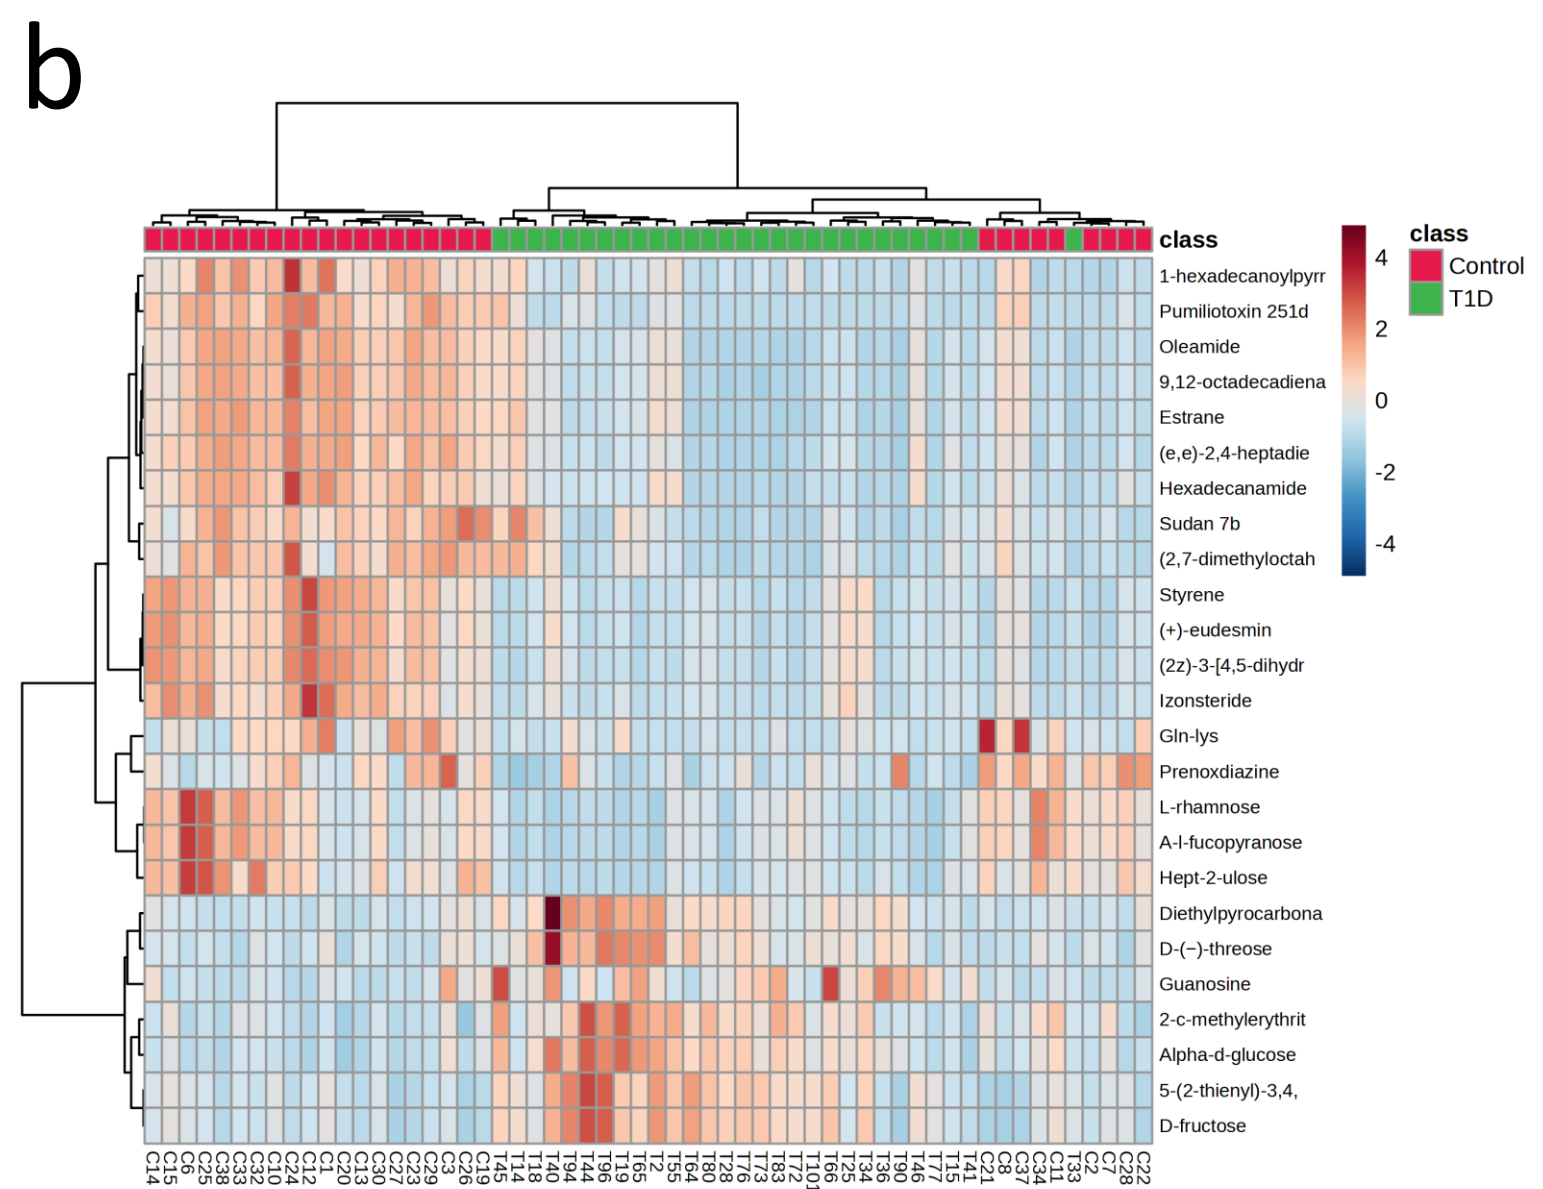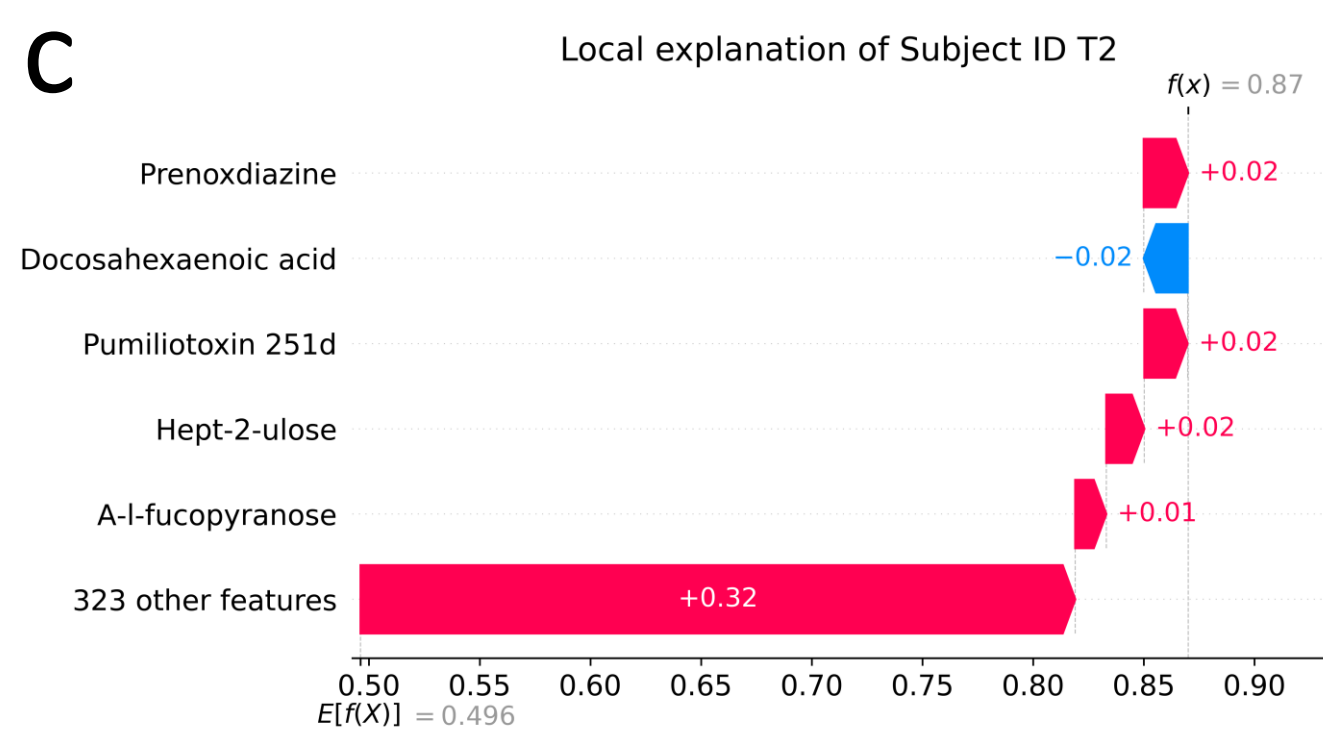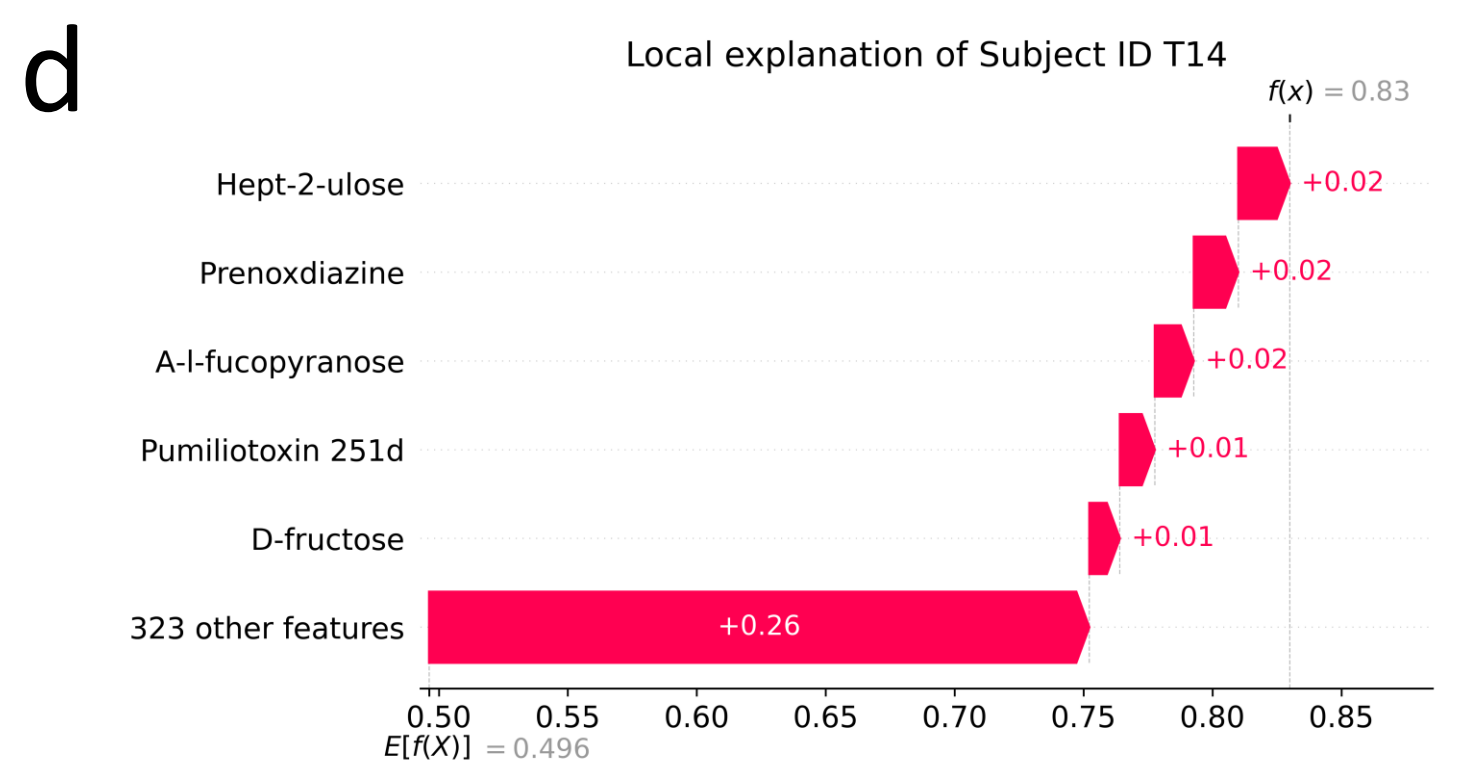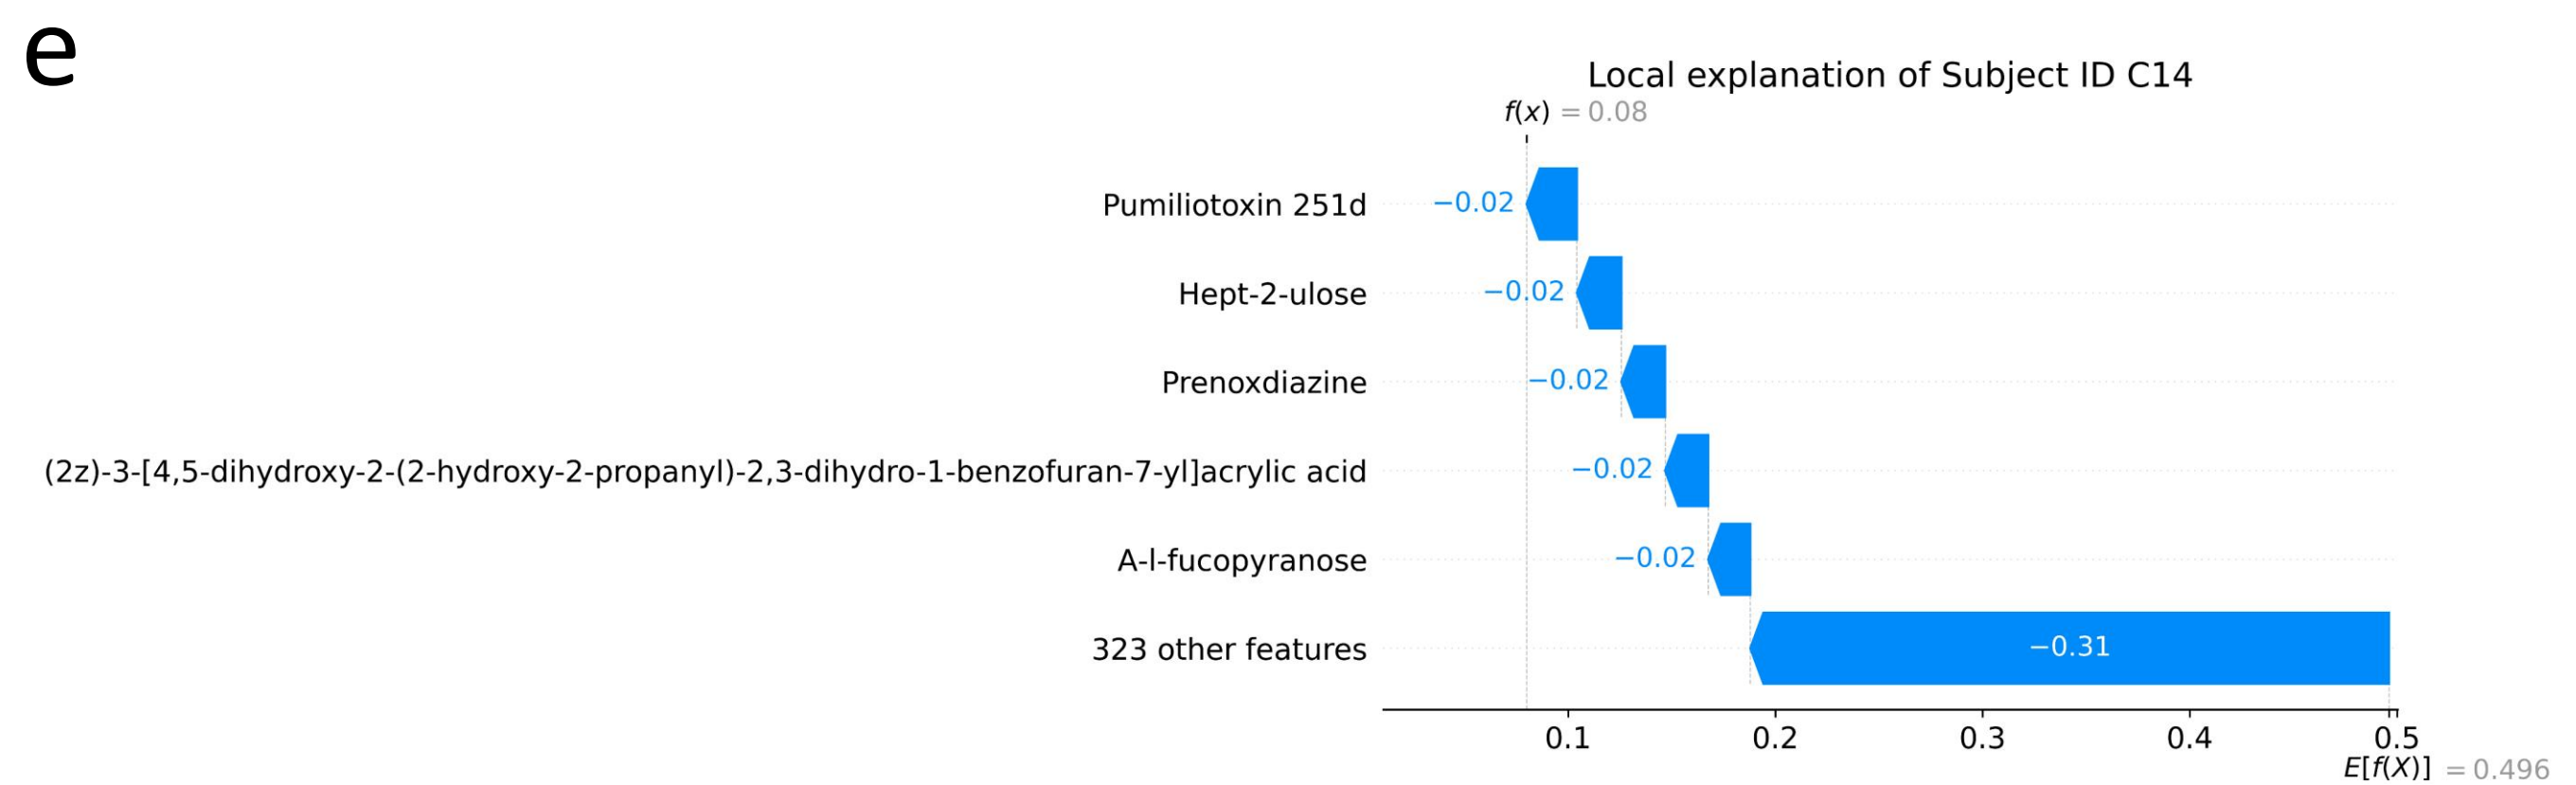

**Supplementary Figure 1:** a. PCA showing the discriminative trend of metabolite composition; b. Heatmap of the top 25 metabolites in control and T1D samples; the local explanations of the three randomly chosen subjects of ID T2(c), ID T14(d) and C14(e) in T1D and control groups.

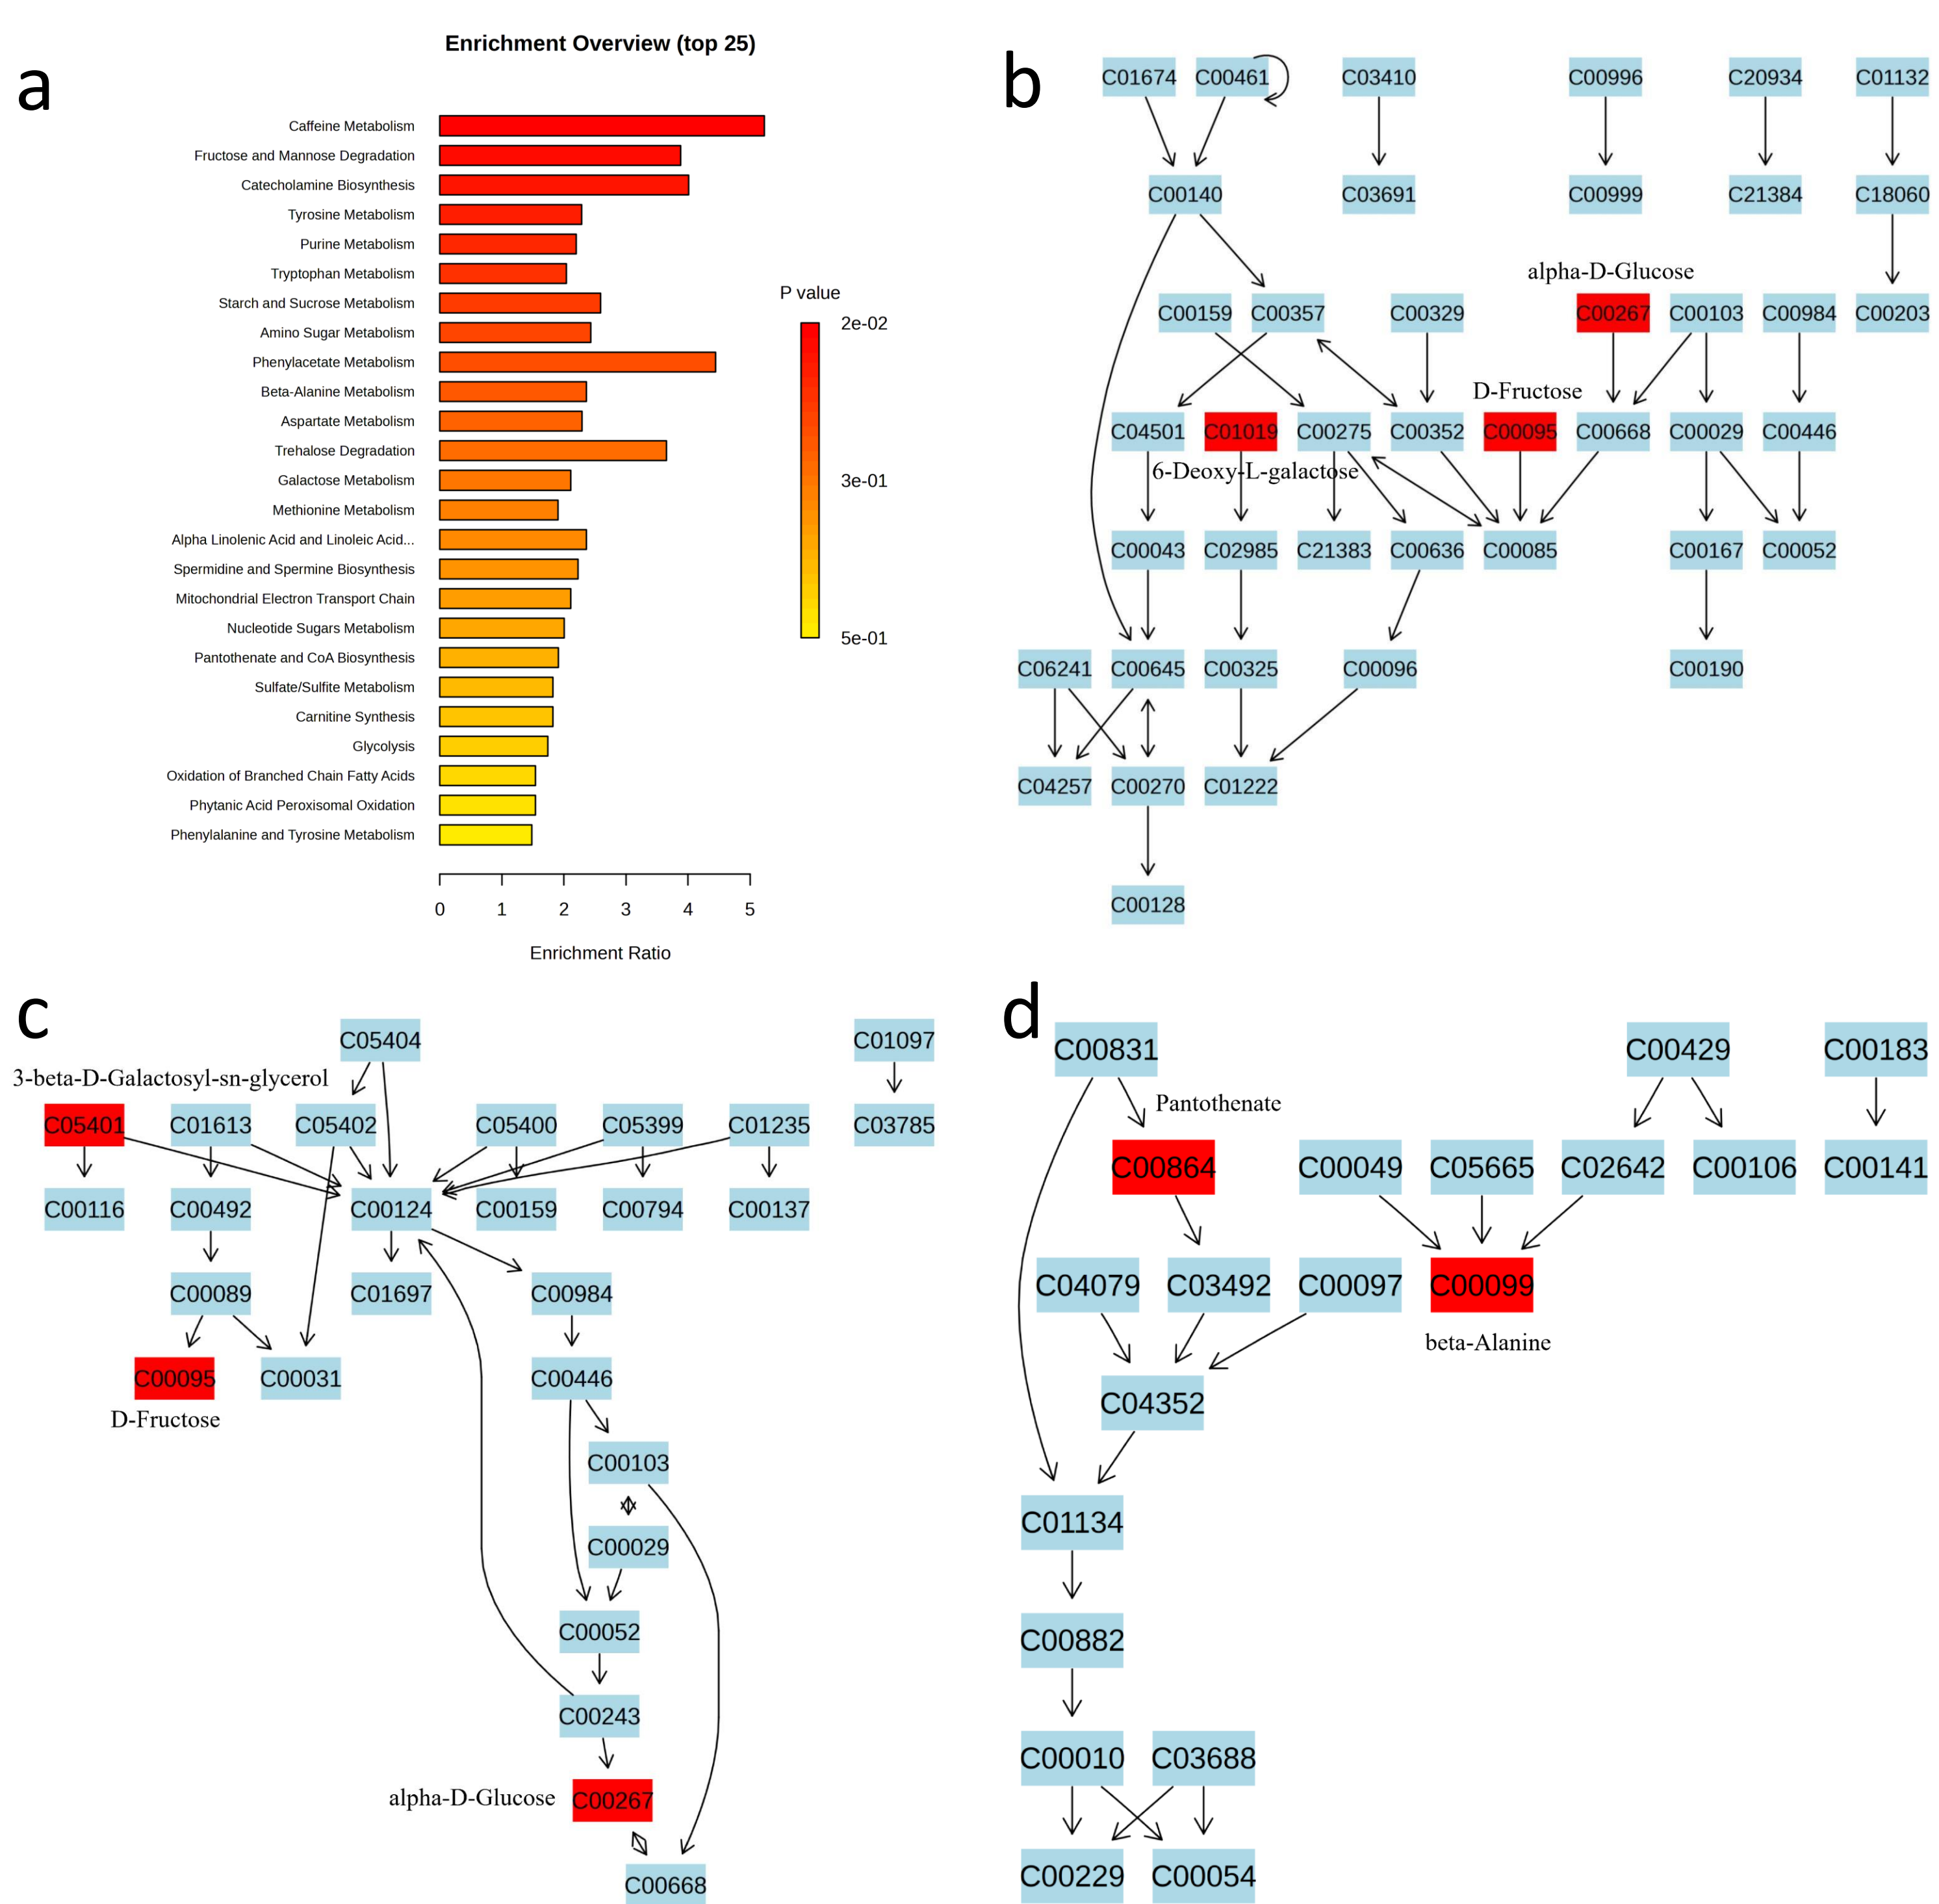

**Supplementary Figure 2:**a. Bar plot showing the top 25 enriched metabolic pathways; (b-d) Network diagrams visualizing key metabolites from three enriched pathways in both T1D and control groups, with significant metabolites marked in red:(b) Amino Sugar and Nucleotide Sugar Metabolism;(c) Galactose Metabolism;(d) Pantothenate and CoA Biosynthesis.
